# Supplementary material for: Effects of functional groups of graphene oxide on the electrochemical performance of lithium-ion batteries
Source: Royal Society of Chemistry journal article supplement (doi:10.1039/c5ra17854a), 2015-01-01
Supplement: c5ra17854a1.pdf [file c5ra17854a1.pdf]

## Supporting Online Materials for

# Effects of functional groups of graphene oxide on the electrochemical performance in lithium-ion batteries

Zhengwei Xie<sup>a,b</sup>, Zuolong Yu<sup>a</sup>, Weifeng Fan<sup>a</sup>, Gongchang Peng<sup>a</sup>, Meizhen Qu<sup>\*a</sup>

<sup>a</sup> Chengdu Institute of Organic Chemistry, Chinese Academy of Sciences, Chengdu 610041, PR China.

<sup>b</sup> Graduate University of Chinese Academy of Sciences, Beijing 100039, PR China.

## Supplementary figures

**Fig. S1** The (a) discharge/charge curves and (b) initial coulomb efficiency of the LGC and LGCC electrodes

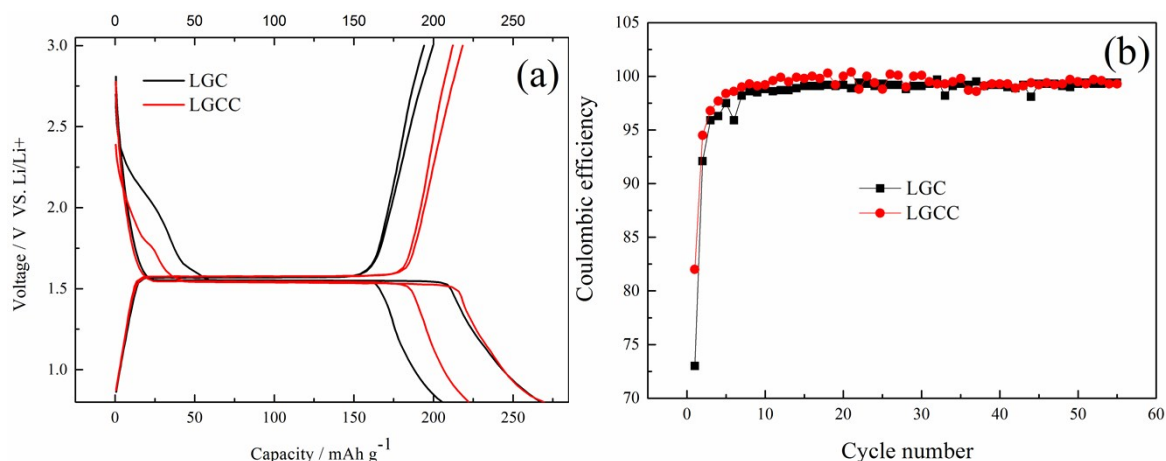

Spinel Li<sub>4</sub>Ti<sub>5</sub>O<sub>12</sub> (LTO) has been investigated in recent years, however, the low specific capacity (175 mAh g<sup>-1</sup> for theoretical and 160 mAh g<sup>-1</sup> for actual) seriously hinder its large-scale application as high energy density and rate performance batteries. In our previous work<sup>1</sup>, the LGC electrode was prepared and showed high capacity (200 mAh g<sup>-1</sup>) than that of pure LTO. Utilizing the prepare GO-COOH instead the GO, the LGCC electrode was prepare and investigated. The specific capacity of LGCC electrode has been increased by 10% than that of LGC electrode (shown in Fig. S1a). And the initial

\* Corresponding author. Fax: +86 28 85215069; Tel.: +86 28 85228839; E-mail: mzhqu@cioc.ac.cn, xiezhengwei116@hotmail.com

coulomb efficiency has been also improved greatly, from 72% to 82% (shown in Fig. S1b).

## **References**

S1 Z. W. Xie, X. Li, W. Li, M. Z. Chen and M. Z. Qu, *J. Power Sources*, 2015, 273, 754.
